# Supplementary material
Source: HighWire-hosted journal article supplement (https://jnm.snmjournals.org/highwire/filestream/94428/field_highwire_adjunct_files/0/105197_Supplemental_Data.pdf)
Supplement: 105197_Supplemental_Data.pdf [file 105197_Supplemental_Data.pdf]

Supplemental Table 1. LBMSUVmax Cohort: Baseline Characteristics, treatment and outcome

| <b>Characteristic</b>     |              |            |            |                        |
|---------------------------|--------------|------------|------------|------------------------|
| <i>Patient features</i>   | All Patients | Male       | Female     | Significance; <i>p</i> |
| Sex (N, %)                |              | 100 (68.0) | 47 (32.0)  |                        |
| Median age (range)        | 67 (43-85)   | 67 (43-85) | 67 (45-84) | 1.000                  |
| Ethnicity (N, %)          |              |            |            |                        |
| Asian descent             | 10 (6.8)     | 7 (7.0)    | 3 (6.4)    | 0.889795               |
| Non-Asian                 | 137 (93.2)   | 93 (93.0)  | 44 (93.6)  |                        |
| Smoking status (N, %)     |              |            |            |                        |
| Never smoker              | 15 (10.2)    | 6 (6.0)    | 9 (19.1)   | 0.014041               |
| Ever smoker               | 132 (89.8)   | 94 (94.0)  | 38 (80.9)  |                        |
| ECOG (N, %)               |              |            |            |                        |
| 0                         | 85 (57.8)    | 59 (59.0)  | 26 (55.3)  | 0.673423               |
| ≥ 1                       | 62 (42.2)    | 41 (40.0)  | 21 (44.7)  |                        |
| Diabetes                  |              |            |            |                        |
| Present                   | 24 (16.3)    | 18 (18.0)  | 6 (12.8)   | 0.423287               |
| Absent                    | 123 (83.7)   | 82 (82.0)  | 41 (87.2)  |                        |
| <i>Tumour features</i>    |              |            |            |                        |
| Histology (N, %)          |              |            |            |                        |
| Adenocarcinoma            | 75 (51.0)    | 47 (47.0)  | 28 (59.6)  | 0.222674               |
| Squamous cell carcinoma   | 50 (34.0)    | 35 (35.0)  | 15 (31.9)  |                        |
| Other                     | 22 (15)      | 18 (18.0)  | 4 (8.5)    |                        |
| Tumour grade (N, %)       |              |            |            |                        |
| Poorly differentiated     | 68 (46.2)    | 61 (61.0)  | 7 (14.9)   | < 0.001                |
| Moderately differentiated | 60 (40.8)    | 38 (38.0)  | 22 (46.8)  |                        |
| Well differentiated       | 19 (13)      | 1 (1.0)    | 18 (38.3)  |                        |
| Vascular Invasion         |              |            |            |                        |
| Absent                    | 81 (55.1)    | 52 (52.0)  | 29 (61.7)  | 0.270044               |
| Present                   | 66 (44.9)    | 48 (48.0)  | 18 (38.3)  |                        |
| Lymphatic Invasion        |              |            |            |                        |
| Absent                    | 98 (66.7)    | 63 (63.0)  | 35 (74.5)  | 0.16895                |
| Present                   | 49 (33.3)    | 37 (37.0)  | 12 (25.5)  |                        |
| Neural Invasion           |              |            |            |                        |
| Absent                    | 132 (89.8)   | 89 (89.0)  | 43 (91.5)  | 0.641924               |
| Present                   | 15 (10.2)    | 11 (11.0)  | 4 (8.5)    |                        |

|                                   |            |           |           |            |
|-----------------------------------|------------|-----------|-----------|------------|
| <i>Staging 7<sup>th</sup> ed.</i> |            |           |           |            |
| Pathologic TNM stage (N, %)       |            |           |           |            |
| Ia                                |            |           |           |            |
| Ib                                | 39 (26.5)  | 18 (18.0) | 21 (44.7) |            |
| II                                | 35 (23.8)  | 26 (26.0) | 9 (19.1)  |            |
| III                               | 41 (27.9)  | 31 (31.0) | 10 (21.3) | 0.01857364 |
| IV                                | 24 (16.3)  | 19 (19.0) | 5 (10.6)  |            |
|                                   | 8 (5.5)    | 6 (6.0)   | 2 (4.3)   |            |
| <i>Treatment details</i>          |            |           |           |            |
| Adjuvant treatment                |            |           |           |            |
| Yes                               | 75 (51.0)  | 40 (40.0) | 35 (74.5) | < 0.001    |
| No                                | 72 (49.0)  | 60 (60.0) | 12 (25.5) |            |
| Surgical approach (N, %)          |            |           |           |            |
| Open                              | 74 (43.5)  | 52 (52.0) | 22 (46.8) | 0.957441   |
| Thoracoscopy                      | 83 (56.5)  | 58 (48.0) | 25 (53.2) |            |
| Resection (N, %)                  |            |           |           |            |
| Pneumonectomy                     | 14 (9.5)   | 11 (11.0) | 3 (6.4)   |            |
| Lobectomy                         | 101 (68.7) | 64 (64.0) | 37 (74.7) | 0.31779133 |
| Other anatomic                    | 17 (11.6)  | 14 (14.0) | 3 (6.4)   |            |
| Wedge resection                   | 15 (10.2)  | 11 (11.0) | 4 (8.5)   |            |
| Resection type (N, %)             |            |           |           |            |
| Anatomic                          | 132 (89.8) | 89 (89.0) | 43 (91.5) | 0.641924   |
| Non-anatomic                      | 15 (10.2)  | 11 (11.0) | 4 (8.5)   |            |
